# RHEUMATOLOGY

VOLUME 47 SUPPLEMENT 2 APRIL 2008

## CONTENTS

### BSR Annual Meeting and BHPR Spring Meeting Abstracts

#### BSR CONCURRENT ORAL PRESENTATION OF ABSTRACTS (TUESDAY 22 APRIL 2008, 17:00–18:30)

|       |                                          |     |
|-------|------------------------------------------|-----|
| 1–6   | Concurrent Oral 1 – Osteoarthritis       | ii1 |
| 7–12  | Concurrent Oral 2 – Paediatrics          | ii2 |
| 13–18 | Concurrent Oral 3 – Spondylarthropathies | ii4 |
| 19–24 | Concurrent Oral 4 – Cardiovascular       | ii6 |
| 25–30 | Concurrent Oral 5 – Pain                 | ii8 |

#### BSR/BHPR PLENARY SESSION (WEDNESDAY 23 APRIL 2008, 14:00–16:00)

|       |         |      |
|-------|---------|------|
| 31–35 | Plenary | ii10 |
|-------|---------|------|

#### BSR CONCURRENT ORAL PRESENTATION OF ABSTRACTS (THURSDAY 24 APRIL 2008, 14:30–16:30)

|       |                                                    |      |
|-------|----------------------------------------------------|------|
| 36–43 | Concurrent Oral 6 – Genetics                       | ii12 |
| 44–51 | Concurrent Oral 7 – Rheumatoid Arthritis Treatment | ii14 |
| 52–58 | Concurrent Oral 8 – Case Reports                   | ii17 |
| 59–66 | Concurrent Oral 9 – Aetiopathogenesis              | ii19 |
| 67–74 | Concurrent Oral 10 – Connective Tissue Diseases    | ii21 |
| 75–82 | Concurrent Oral 12 – BHPR                          | ii23 |

#### POSTER VIEWING I (WEDNESDAY 23 APRIL 2008, 08:30–10:00)

|         |                                                                        |      |
|---------|------------------------------------------------------------------------|------|
| 83–92   | Paediatric and Adolescent Rheumatology                                 | ii26 |
| 93–171  | Rheumatoid Arthritis – Treatment                                       | ii28 |
| 172–201 | Rheumatoid Arthritis – Aetiopathogenesis and Animal Models             | ii52 |
| 202     | Functional Genomics                                                    | ii60 |
| 203–204 | Stem Cells and Tissue Engineering                                      | ii60 |
| 205–215 | Cytokines and Inflammatory Mediators                                   | ii60 |
| 216–220 | Cell Receptor–Ligand Interaction, Signalling, Activation and Apoptosis | ii63 |
| 221–274 | Spondylarthropathies (including Psoriatic Arthritis)                   | ii65 |
| 275–278 | Metabolic and Crystal Arthropathies                                    | ii81 |

#### POSTER VIEWING II (THURSDAY 24 APRIL 2008, 08:30–10:00)

|         |                                                            |       |
|---------|------------------------------------------------------------|-------|
| 279–288 | Sjögren's Syndrome and Other Connective Tissue Disorders   | ii83  |
| 289–307 | Scleroderma and Related Disorders                          | ii85  |
| 308–334 | Systemic Lupus Erythematosus and Antiphospholipid Syndrome | ii91  |
| 335–345 | Vasculitis                                                 | ii98  |
| 346–398 | Rheumatoid Arthritis – Clinical Aspects                    | ii101 |
| 399–425 | Health Services Research, Economics and Outcomes Research  | ii116 |
| 426–438 | Education Research                                         | ii124 |
| 439–469 | Case Reports (I)                                           | ii127 |

**POSTER VIEWING III (FRIDAY 25 APRIL 2008, 08:30–10:00)**

|         |                                                                |       |
|---------|----------------------------------------------------------------|-------|
| 470–523 | BHPR – Audit/Service Delivery                                  | ii137 |
| 524–545 | BHPR – Research                                                | ii151 |
| 546–574 | Case Reports (II)                                              | ii158 |
| 575–585 | Miscellaneous Rheumatic Diseases                               | ii165 |
| 586–614 | Osteoporosis and Metabolic Bone Disease                        | ii168 |
| 615–618 | Biology of Bone, Cartilage and Connective Tissue Disease       | ii177 |
| 619–621 | Orthopaedics and Rehabilitation                                | ii178 |
| 622–628 | Osteoarthritis                                                 | ii178 |
| 629–633 | Psychology, Measurement and Management of Pain                 | ii180 |
| 634–649 | Soft Tissue and Regional Musculoskeletal Disease, Fibromyalgia | ii182 |
| 650–660 | Epidemiology                                                   | ii186 |
|         | <b>ABSTRACT REVIEWERS</b>                                      | ii191 |
|         | <b>AUTHOR INDEX</b>                                            | ii192 |

Every effort has been made to faithfully reproduce the abstracts as submitted. However, no responsibility is assumed by the Organisers for any injury and/or damage to persons or property as a matter of product liability, negligence or otherwise, or from any use or operation of any methods, products, instructions or ideas contained in the material herein. Because of rapid advances in the medical sciences, we recommend that independent verification of diagnoses and drug doses should be made.
